# Supplementary material
Source: publisher figshare collection journal article supplement (https://acs.figshare.com/ndownloader/files/21487308)
Supplement: Supplementary file 1 [file 21487308]

**Supporting Information for**

**Understanding the Inhibition of the Shuttle Effect of Sulfides ( $S \leq 3$ ) in Lithium-Sulfur Batteries by Heteroatom-Doped Graphene: First-Principles Study**

Benjie Gong, Xuedan Song\*, Yantao Shi, Jianhui Liu, Ce Hao

*State Key Laboratory of Fine Chemicals, School of Chemical Engineering, Dalian*

*University of Technology, Dalian, 116024, China*

\*E-mail: song@dlut.edu.cn

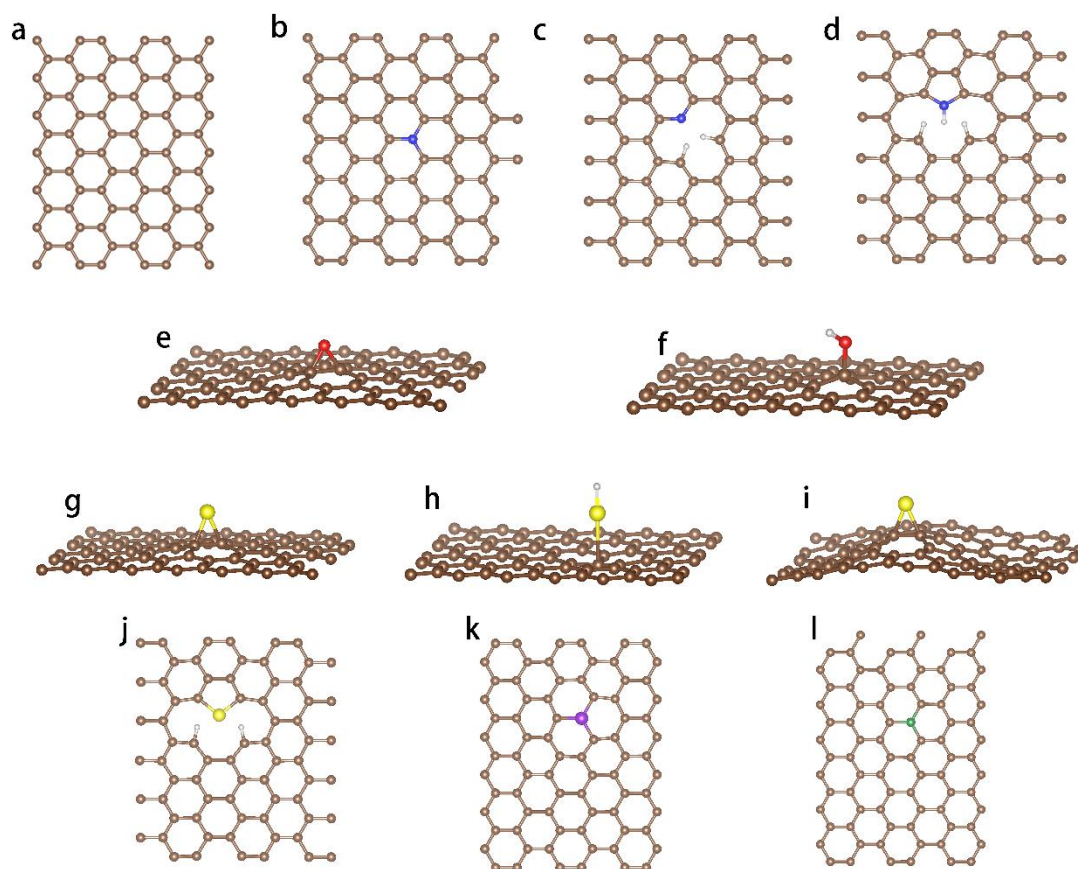

**Fig. S1.** Optimized configuration of (a) undoped graphene (b) graphitic nitrogen (c) pyridine nitrogen (d) pyrrolic nitrogen (l) graphitic boron (k) phosphorus (e) epoxy group (f) hydroxyl group (g) episulfide group (h) sulfydryl group (i) sulfur defect (j) thiophene sulfur.

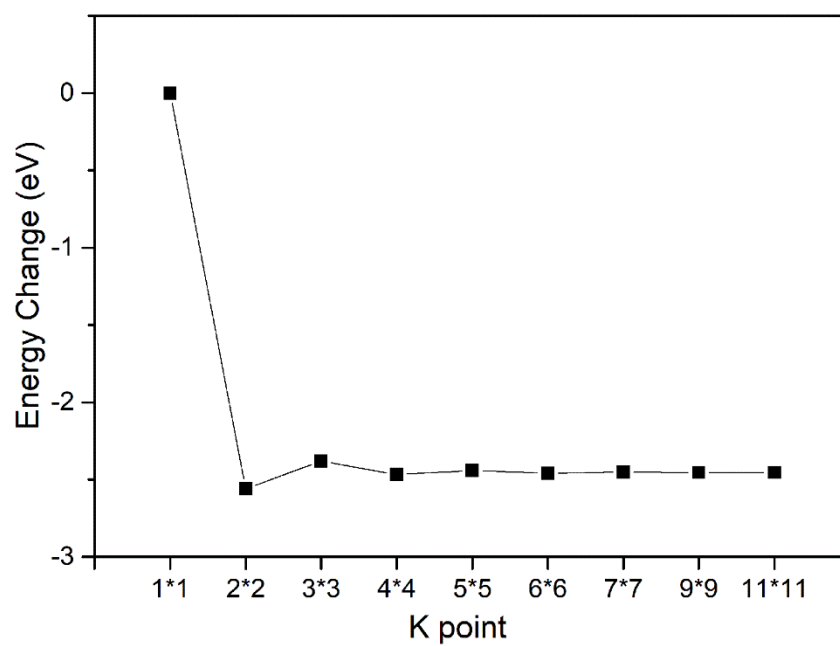

**Fig. S2.** Convergence test of K point along the periodical direction of perfect graphene sheet.

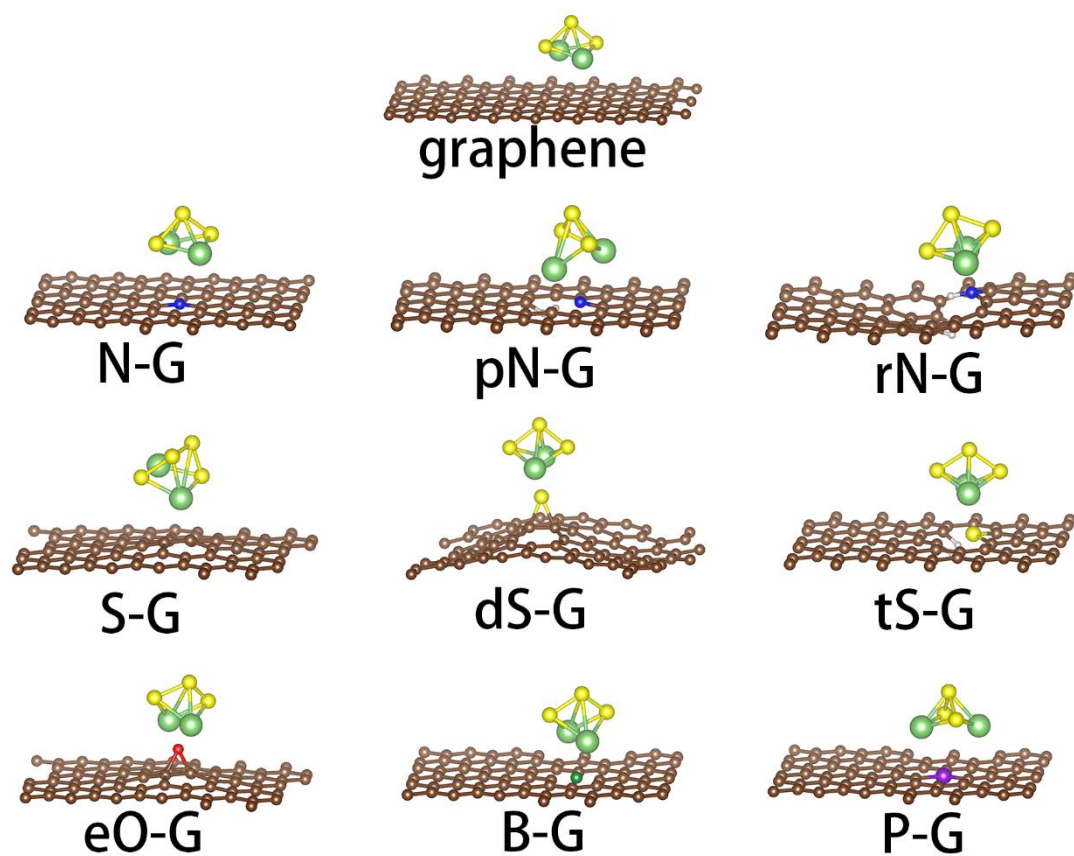

**Fig. S3.** Optimized  $F_1$  adsorption configuration of graphene, N-G, pN-G, rN-G, S-G, dS-G, tS-G, eO-G, B-G, and P-G.

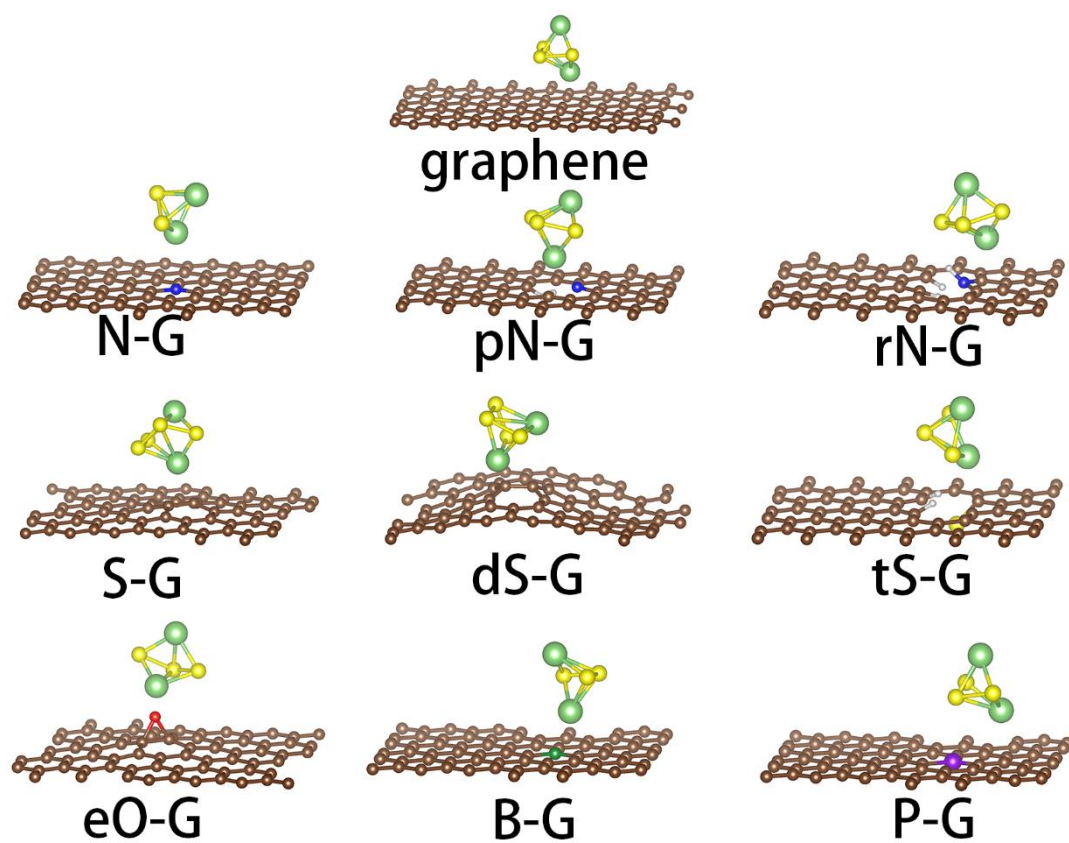

**Fig. S4.** Optimized  $F_2$  adsorption configuration of graphene, N-G, pN-G, rN-G, S-G, dS-G, tS-G, eO-G, B-G, and P-G.

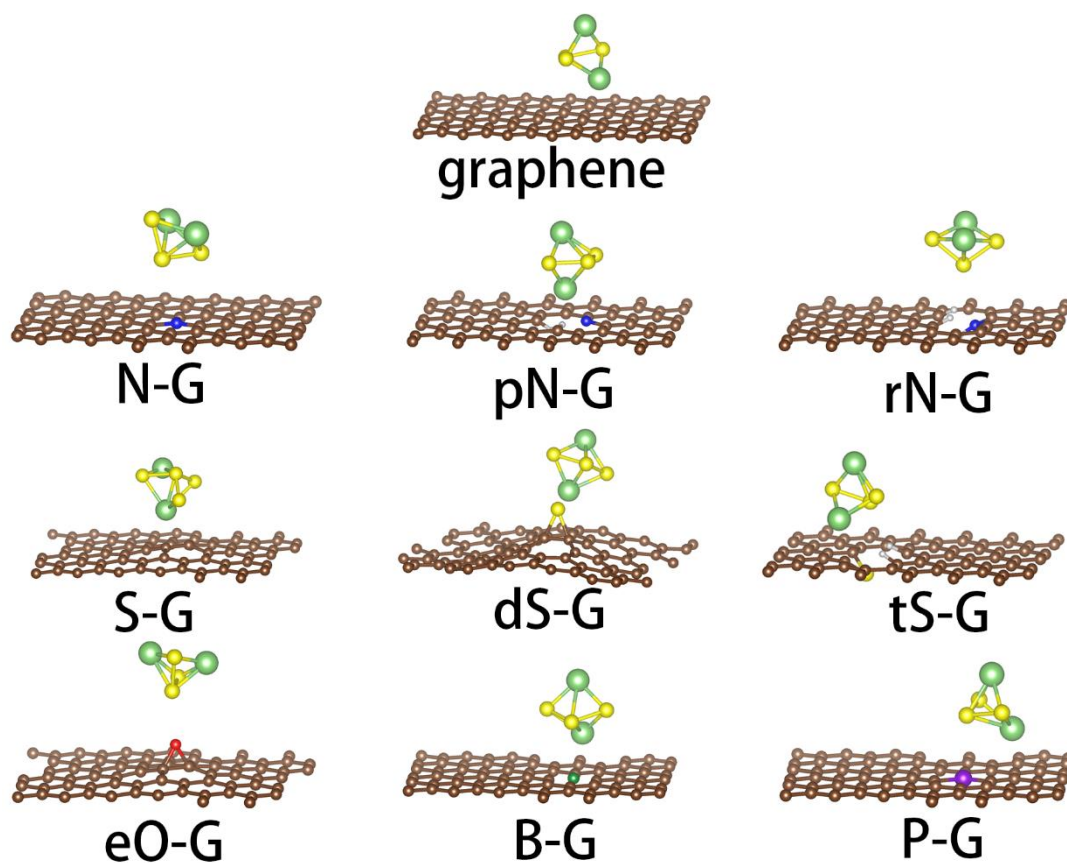

**Fig. S5.** Optimized  $F_3$  adsorption configuration of graphene, N-G, pN-G, rN-G, S-G, dS-G, tS-G, eO-G, B-G, and P-G.

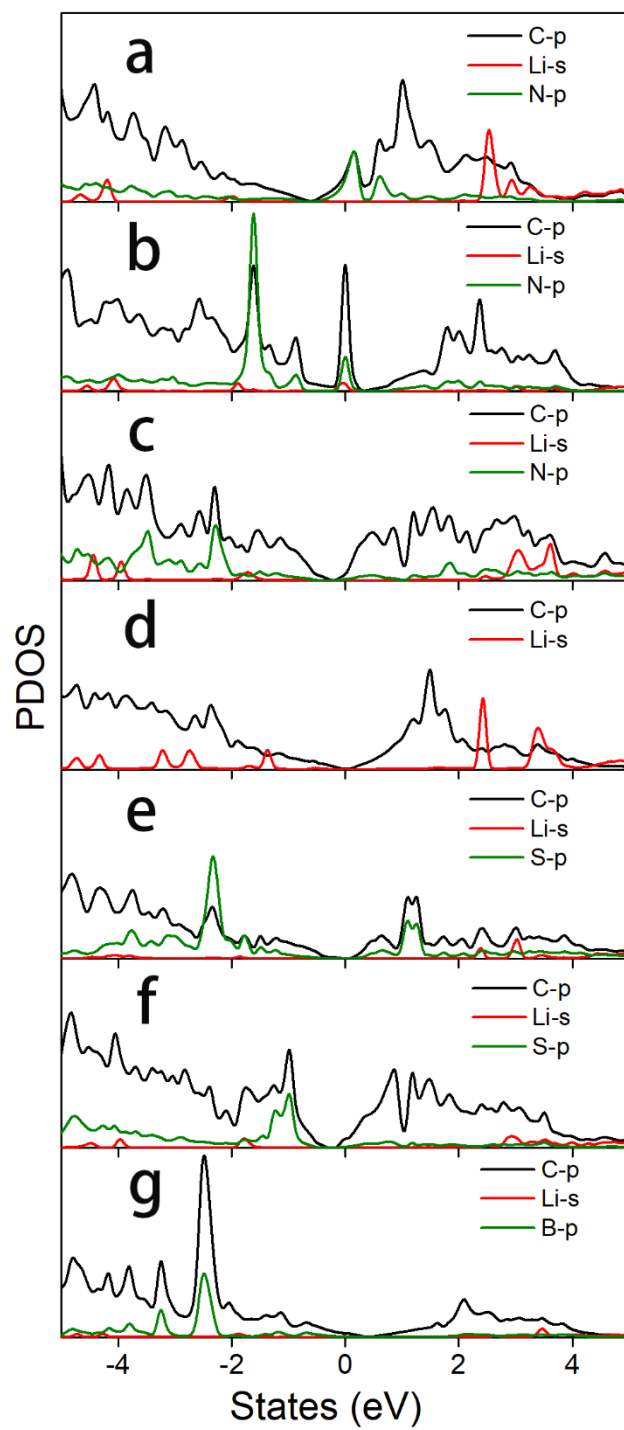

**Fig. S6.** Atomic projected density of state near Fermi energy region for  $\text{Li}_2\text{S}_3$  adsorbing on the surface of (a) N-G, (b) pN-G, (c) rN-G, (d) S-G, (e) dS-G, (f) tS-G, (g) B-G.

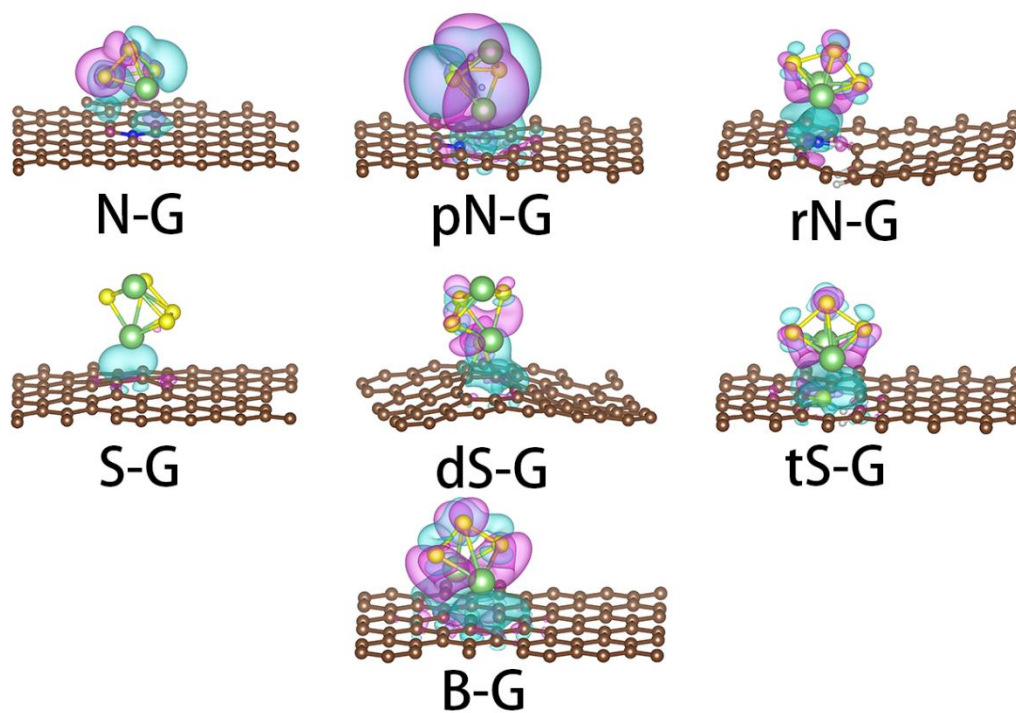

**Fig. S7.** The illustrations of charge density difference of  $\text{Li}_2\text{S}_3$  adsorbing on the surface of (a) N-G, (b) pN-G, (c) rN-G, (d) S-G, (e) dS-G, (f) tS-G, (g) B-G, isosurface level is  $0.0009 \text{ e } \text{\AA}^{-3}$
